# Supplementary material for: Improvement of the O2 storage/release rate of YMnO3 nanoparticles synthesized by the polymerized complex method
Source: Royal Society of Chemistry journal article supplement (doi:10.1039/c9dt04095a), 2019-12-13
Supplement: c9dt04095a1.pdf [file c9dt04095a1.pdf]

Electronic Supplementary Information

**Improvement of O<sub>2</sub> storage/release rate in  
YMnO<sub>3</sub> nanoparticles synthesized by  
polymerization-complex method**

Yusuke Asakura,<sup>a\*</sup> Amiko Miyake,<sup>a</sup> Mayu Otomo,<sup>a</sup> and Shu Yin<sup>a\*</sup>

*<sup>a</sup>Institute of Multidisciplinary Research for Advanced Materials (IMRAM), Tohoku  
University, 2-1-1 Katahira, Aoba-ku, Sendai 980-8577  
Email: asa@tohoku.ac.jp, shuyin@tagen.tohoku.ac.jp*

## Experimental

### *Preparation of $YMnO_3$ nanoparticles by polymerization-complex method*

$(CH_3COO)_3Y \cdot 4H_2O$  (98%, FUJIFILM Wako Pure Chemical Co.) and  $Mn(CO_3)_2 \cdot nH_2O$  (88%  $Mn(CO_3)_2$ , FUJIFILM Wako Pure Chemical Co.) (Y:Mo = 1:1) was added into  $3.2 \text{ mol} \cdot \text{L}^{-1}$  citric acid (CA) aqueous solution, and stirred on a hot plate at  $40 \text{ }^\circ\text{C}$ . After complete dissolution of the two reagents, 5.876 mL ethylene glycol (EG) was further added. In the solution, 0.064 mol CA and 0.105 mol EG were included, and heated with stirring at  $150 \text{ }^\circ\text{C}$  until formation of transparent gel. The obtained gel was calcined to form a black powder. The obtained samples were denoted as YMO\_XXX\_YY where XXX and YY means calcination temperature and time, respectively. In addition, the ratio of CA and EG was altered for the gel formation. In this case,  $5.4 \text{ mol} \cdot \text{L}^{-1}$  CA aqueous solution was used instead of  $3.2 \text{ mol} \cdot \text{L}^{-1}$  CA aqueous solution. The obtained gel was calcined at  $800 \text{ }^\circ\text{C}$  for 6 h. The obtained sample was denoted as YMO\_CA\_800\_6.

### *Characterization*

Powder XRD measurements were conducted on a Bruker D2 Phaser with  $\text{Cu K}\alpha$  ( $\lambda = 0.15418 \text{ nm}$ ). The transmission electron microscopy images were collected with a JEOL JEM2000EXII electron microscope.

### *Evaluation of oxygen storage property*

TG-DTA machine (Rigaku Co., ThermoPlusEVO TG8120) was used for evaluation of oxygen storage property. Before the evaluation, the samples were heated from r.t. to  $500 \text{ }^\circ\text{C}$ , and subsequently cooled to r.t. under  $\text{N}_2$  flow ( $100 \text{ mL} \cdot \text{min}^{-1}$ ) with a ramping/decreasing rate of  $5 \text{ }^\circ\text{C} \cdot \text{min}^{-1}$  in the TG-DTA machine. After the pre-treatment, TG measurement was directly conducted for the treated samples under pure  $\text{O}_2$  flow ( $100 \text{ mL} \cdot \text{min}^{-1}$ ) or atmospheric air (relative humidity 20 % at 25%) by heating from r.t. to  $500 \text{ }^\circ\text{C}$  and the subsequent cooling to r.t. with a ramping/decreasing rate of 1 or  $5 \text{ }^\circ\text{C} \cdot \text{min}^{-1}$ .

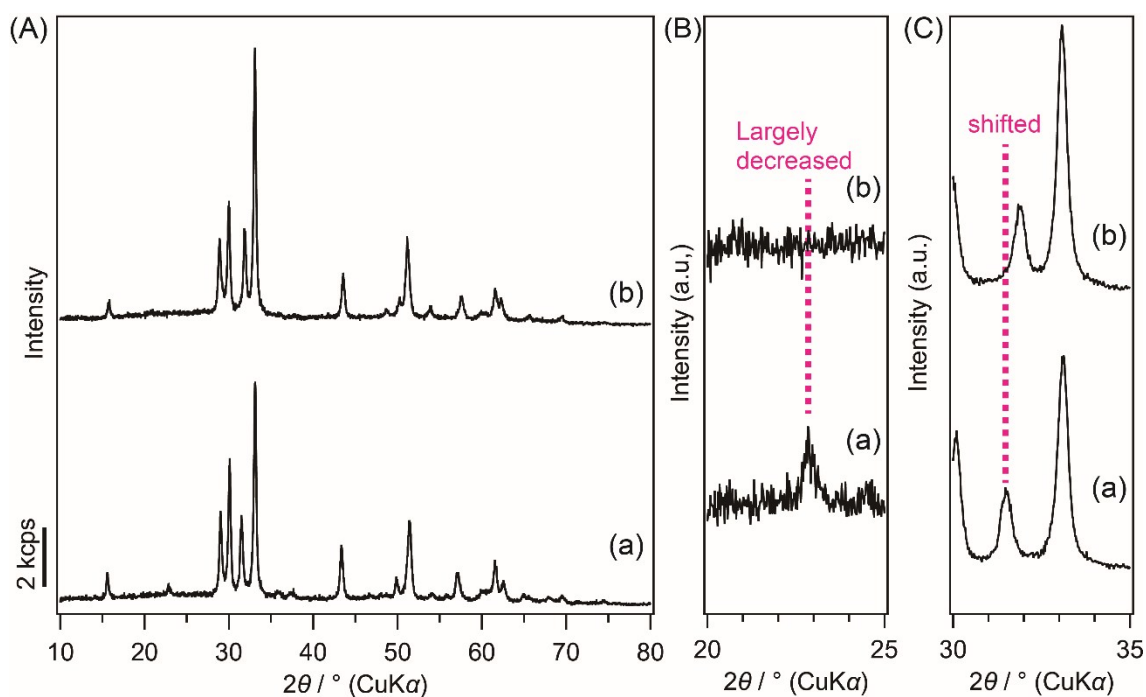

**Fig. S1** XRD patterns of YMO\_800\_6 (a) before and (b) after the TG measurement under pure O<sub>2</sub> flow with a  $2\theta$  range of (A) 10-80°, (B) 20-25°, and (C) 30-35°.

After the TG measurement, the intensity of the peak at 23° was largely decreased, and the peak at 31.5° was shifted to higher angle region. The two behaviors with the retention of basic diffractions mean the appearance of the oxygen-adsorbed YMnO<sub>3</sub> phase (A. Klimkowicz *et al.*, *J. Solid State Chem.*, **258**, 471 (2018)).
